# Supplementary material for: Structural characterization of aluminium(iii) and iron(iii) complexes of coumarinic acid in aqueous solutions from combined experimental and theoretical investigations
Source: Royal Society of Chemistry journal article supplement (doi:10.1039/c8nj01244j), 2018-01-01
Supplement: c8nj01244j1.pdf [file c8nj01244j1.pdf]

**Structural characterization of aluminium (III) and iron (III) complexes of coumarinic acid in aqueous solution from combined experimental and theoretical investigations**

Emilia Furia, Amerigo Beneduci, Nino Russo and Tiziana Marino\*

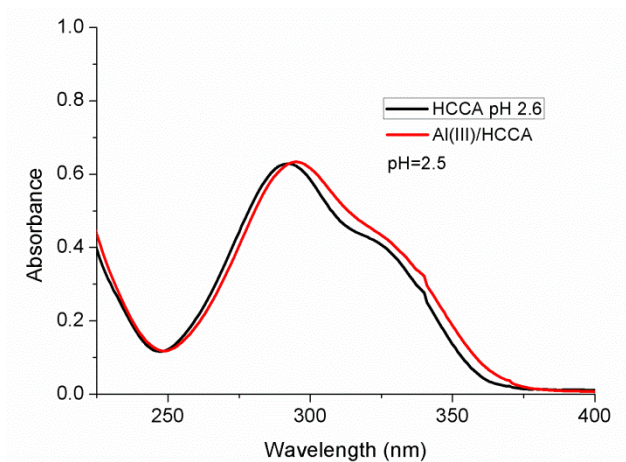

**Figure S1.** UV-Vis spectra of the free ligand 0.1 mM (black line) and of the complexes formed between ligand and  $\text{AlCl}_3$  0.1 mM (red line) at pH 2.5

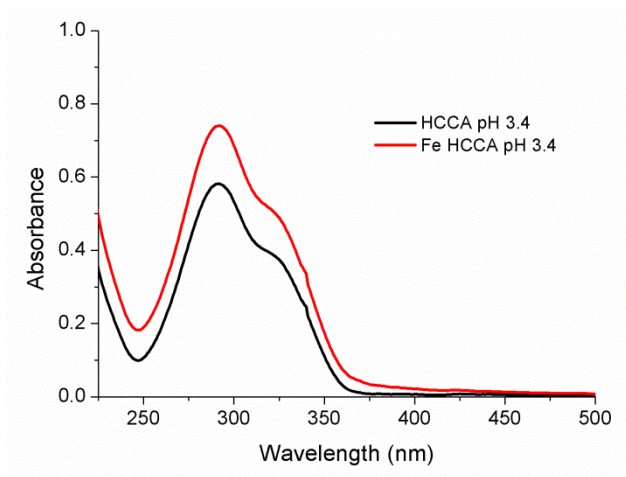

**Figure S2.** UV-Vis spectra of the free ligand 0.1 mM (black line) and of the complexes formed between ligand and  $\text{FeCl}_3$  0.1 mM (red line) at pH 3.4

**Table S1.** NBO charge values ( $|e|$ ) for some atoms of the lowest energy complexes of aluminium in typology (1,-4,1) in comparison with the free ligand.

|                | Free ligand | Al-octa<br>(a) | Al-tetra<br>(c) |
|----------------|-------------|----------------|-----------------|
| C2             | 0.797       | 0.857          | 0.802           |
| C3             | -0.198      | -0.236         | -0.236          |
| C4             | -0.175      | -0.110         | -0.118          |
| C5             | -0.213      | -0.199         | -0.197          |
| C6             | -0.282      | -0.275         | -0.280          |
| C7             | -0.250      | -0.230         | -0.231          |
| C8             | -0.286      | -0.280         | -0.287          |
| C11            | 0.767       | 0.819          | 0.811           |
| O <sub>a</sub> | -0.796      | -0.712         | <b>-0.878</b>   |
| O <sub>b</sub> | -0.749      | <b>-0.805</b>  | -0.637          |
| O              | -0.574      | <b>-0.628</b>  | -0.562          |
| Al             | -           | 2.029          | 2.063           |
